# Supplementary material
Source: PubMed Central journal article supplement (PMC4281578)
Supplement: msy-0005-0268-s01.pdf [file msy-0005-0268-s01.pdf]

Table1: All reported patients with OI type VI and *SERPINF1* mutations

|                                                    | Cho et al [2013]                    | Caparrós-Martin et al [2013]    |                          |                                       |                           | Tucker et al [2012]   | Venturi et al [2012] |                           |               |
|----------------------------------------------------|-------------------------------------|---------------------------------|--------------------------|---------------------------------------|---------------------------|-----------------------|----------------------|---------------------------|---------------|
|                                                    |                                     | Family 8<br>(Patient 9)         | Family 8<br>(Patient 10) | Family 9<br>(Patient 11)              | Family 10<br>(Patient 12) |                       | Patient V-1          | Patient V-3               | Patient V-4   |
| OI Type                                            | VI                                  | VI                              | VI                       | VI                                    | VI                        | VI                    | VI                   | VI                        | VI            |
| Birth weight/Birth length                          | Normal/Normal                       | -                               | -                        | -                                     | -                         | -                     | Normal/Normal        | Normal/Normal             | Normal/Normal |
| Confirmed prenatal fractures                       | No                                  | -                               | -                        | -                                     | -                         | -                     | No                   | No                        | No            |
| Age of first fracture (months)                     | 18                                  | 4                               | 4                        | 4                                     | 6                         | 11                    | 11                   | 6                         | 12            |
| Color of sclerae                                   | White                               | Faint Blue                      | Faint Blue               | White                                 | Very Faint Blue           | -                     | Grayish              | Grayish                   | Grayish       |
| Dentinogenesis imperfecta                          | No                                  | Yes                             | No                       | No                                    | No                        | -                     | No                   | No                        | No            |
| Retarded gross motor functions                     | No                                  | Yes                             | Yes                      | Yes                                   | Yes                       | Yes                   | No                   | Mild                      | No            |
| Normal intelligence                                | Yes                                 | Yes                             | Yes                      | Yes                                   | Yes                       | Yes                   | Yes                  | Yes                       | Yes           |
| Hearing impairment                                 | No                                  | No                              | No                       | No                                    | No                        | No                    | -                    | -                         | -             |
| Hipermobility of joints                            | No                                  | Yes                             | Yes                      | No                                    | Yes                       | -                     | Yes                  | Yes                       | Yes           |
| Age at start of treatment with pamidronate (years) | 3                                   | -                               | -                        | -                                     | -                         | 7                     | -                    | -                         | -             |
| Ability to walk (with crutches)                    | No                                  | No                              | No                       | No                                    | No                        | Yes                   | No                   | No                        | Autonomously  |
| Weight (kg)/BMI of last visit                      | -                                   | -                               | -                        | -                                     | -                         | -                     | -                    | -                         | -             |
| Length (cm)/SD of last visit                       | 100/>-2                             | -                               | -                        | -                                     | -                         | 159/<3rd centile      | -                    | -                         | -             |
| Wormian bones                                      | -                                   | Yes                             | No                       | Yes                                   | Yes                       | -                     | -                    | -                         | -             |
| Vertebral fractures                                | No                                  | Yes                             | -                        | Yes                                   | -                         | No                    | Yes                  | Yes                       | Yes           |
| Old fractures of extremities                       | Yes                                 | -                               | Yes                      | -                                     | -                         | Yes                   | Yes                  | Yes                       | -             |
| Tapering of ribs                                   | No                                  | Yes                             | -                        | Yes                                   | -                         | -                     | -                    | -                         | -             |
| Popcorn calcification                              | Yes                                 | Yes                             | -                        | Yes                                   | No                        | -                     | -                    | -                         | -             |
| Rhizomelic shortening of limbs                     | No                                  | -                               | -                        | Yes                                   | Yes                       | -                     | -                    | -                         | -             |
| Bowing of upper extremities                        | -                                   | Severe                          | Severe                   | Severe                                | Yes                       | -                     | Yes                  | Severe                    | No            |
| Bowing and tapering of femur, tibiae and fibulae   | Severe bowing                       | Bowing of femurs                | Bowing                   | Severe tapering of tibiae and fibulae | Bowing of femur           | -                     | Bowing of femurs     | Moderate bowing of femurs | No            |
| Exon                                               | 2 ; 4                               | 6                               |                          | 3                                     |                           | 4                     |                      |                           |               |
| DNA change                                         | c.77dupC;<br>c.421dupC              | c.752_753insKC847088.1:g.51_393 |                          | c.651G>A                              |                           | c.271_279dup          |                      | c.423delG                 |               |
| Protein                                            | p.Glu27Glyfs*38;<br>p.Arg141Profs*5 | -                               |                          | p.Trp217*                             |                           | p.Ala91_Ser93dup      |                      | p.Ile142 Serfs*9          |               |
| Origin                                             | Korean                              | Egyptian                        |                          | -                                     |                           | Italian/Sweish/French |                      |                           |               |

|                                                    | Shaheen et al [2012] |                         |                  | Rauch et al [2012]/Glorieux et al[2002]                                                |                  |                               |                      |                            |                        |
|----------------------------------------------------|----------------------|-------------------------|------------------|----------------------------------------------------------------------------------------|------------------|-------------------------------|----------------------|----------------------------|------------------------|
|                                                    | OI_F5                | OI_F6                   | OI_F12           | Patient 1                                                                              | Patient 2        | Patient 3                     | Patient 4            | Patient 5                  | Patient 6              |
| OI Type                                            | VI                   | VI                      | VI               | VI                                                                                     | VI               | VI                            | VI                   | VI                         | VI                     |
| Birth weight/Birth length                          | -                    | -                       | -                | Normal                                                                                 | Normal           | Normal                        | Normal               | Normal                     | Normal                 |
| Confirmed prenatal fractures                       | -                    | -                       | -                | No                                                                                     | No               | No                            | No                   | No                         | No                     |
| Age of first fracture (months)                     | -                    | -                       | -                | 4-18                                                                                   | 4-18             | 4-18                          | 4-18                 | 4-18                       | 4-18                   |
| Color of sclerae                                   | Blue                 | Blue                    | White            | White                                                                                  | White            | White                         | White                | White                      | White                  |
| Dentinogenesis imperfecta                          | No                   | No                      | No               | No                                                                                     | No               | No                            | No                   | No                         | No                     |
| Retarded gross motor functions                     | -                    | -                       | -                | -                                                                                      | -                | -                             | -                    | -                          | -                      |
| Normal intelligence                                | -                    | -                       | -                | -                                                                                      | -                | -                             | -                    | -                          | -                      |
| Hearing impairment                                 | No                   | No                      | No               | -                                                                                      | -                | -                             | -                    | -                          | -                      |
| Hipermobility of joints                            | -                    | -                       | -                | 2 patients                                                                             |                  |                               |                      |                            |                        |
| Age at start of treatment with pamidronate (years) | -                    | -                       | -                | -                                                                                      | -                | -                             | -                    | -                          | -                      |
| Ability to walk (with crutches)                    | No                   | No                      | No               | 4 patients wheelchair bound; 2 patientes ambulatory; 2 patients walked with assistance |                  |                               |                      |                            |                        |
| Weight (kg)/BMI of last visit                      | -                    | -                       | -                | -                                                                                      | -                | -                             | -                    | -                          | -                      |
| Lenght (cm)/SD of last visit                       | -                    | 110//<-2SD              | -                | -                                                                                      | -                | -                             | -                    | -                          | -                      |
| Wormian bones                                      | -                    | -                       | -                | No                                                                                     | No               | No                            | No                   | No                         | No                     |
| Vertebral fractures                                | Yes                  | Yes                     | Yes              | Yes                                                                                    | Yes              | Yes                           | Yes                  | Yes                        | Yes                    |
| Old fractures of extremities                       | -                    | -                       | -                | Yes                                                                                    | Yes              | Yes                           | Yes                  | -                          | Yes                    |
| Tapering of ribs                                   | -                    | -                       | -                | -                                                                                      | -                | -                             | -                    | -                          | -                      |
| Popcorn calcification                              | -                    | Yes                     | -                | -                                                                                      | -                | -                             | -                    | -                          | -                      |
| Rhizomelic shortening of limbs                     | -                    | -                       | -                | Yes (femurs)                                                                           | -                | -                             | -                    | -                          | -                      |
| Bowing of upper extremities                        | -                    | Severe                  | -                | Yes                                                                                    | Yes              | -                             | -                    | Yes                        | Bowing of left humerus |
| Bowing and tapering of femur, tibiae and fibulae   | -                    | Severe bowing of femurs | -                | Yes (tibiae)                                                                           | Bowing of tibiae | -                             | Bowing of left femur | -                          | -                      |
| Exon                                               | 8                    | 1                       | 6                | 4                                                                                      |                  | 3 ; 4                         | 3                    | 4                          | No Mutation found      |
| DNA change                                         | c.1118_1119del       | c.1-4796dupT            | c.653del         | c.295C>T                                                                               |                  | c.271_279dup;<br>c.295C>T     | c.271_279dup         | c.295C>T                   |                        |
| Protein                                            | p.Pro373Glnfs*18     | -                       | p.Val218Glnfs*22 | p.Arg99*                                                                               |                  | p.Ala91_Ser93dup;<br>p.Arg99* | p.Ala91_Ser93dup     | p.Arg99*                   |                        |
| Origin                                             |                      | Arabian                 |                  | French-Canadian                                                                        |                  | French/Canadian/<br>Irish     | Nicaraguan           | French/<br>Canadian/German | North Quebec           |

Rauch et al [2012]/Glorieux et al[2002]

|                                                    | Patient 7                                                                              | Patient 8                   | Patient 9                 | Patient 10       | Patient 11 | Patient 12   |
|----------------------------------------------------|----------------------------------------------------------------------------------------|-----------------------------|---------------------------|------------------|------------|--------------|
| OI Type                                            | VI                                                                                     | VI                          | VI                        | VI               | VI         | VI           |
| Birth weight/Birth length                          | Normal                                                                                 | Normal                      | -                         | -                | -          | -            |
| Confirmed prenatal fractures                       | No                                                                                     | No                          | -                         | -                | -          | No           |
| Age of first fracture (months)                     | 4-18                                                                                   | 4-18                        | -                         | -                | -          | >6           |
| Color of sclerae                                   | White                                                                                  | White                       | -                         | -                | -          | White        |
| Dentinogenesis imperfecta                          | No                                                                                     | No                          | -                         | -                | -          | No           |
| Retarded gross motor functions                     | -                                                                                      | -                           | -                         | -                | -          | -            |
| Normal intelligence                                | -                                                                                      | -                           | -                         | -                | -          | -            |
| Hearing impairment                                 | -                                                                                      | -                           | -                         | -                | -          | -            |
| Hipermobility of joints                            | 2 patients                                                                             |                             | -                         | -                | -          | -            |
| Age at start of treatment with pamidronate (years) | -                                                                                      | -                           | -                         | -                | -          | -            |
| Ability to walk (with crutches)                    | 4 patients wheelchair bound; 2 patientes ambulatory; 2 patients walked with assistance |                             | -                         | -                | -          | -            |
| Weight (kg)/BMI of last visit                      | -                                                                                      | -                           | -                         | -                | -          | -            |
| Lenght (cm)/SD of last visit                       | -                                                                                      | -                           | -                         | -                | -          | -            |
| Wormian bones                                      | No                                                                                     | No                          | -                         | -                | -          | -            |
| Vertebral fractures                                | Yes                                                                                    | Yes                         | -                         | -                | -          | -            |
| Old fractures of extremities                       | Yes                                                                                    | Yes                         | -                         | -                | -          | -            |
| Tapering of ribs                                   | -                                                                                      | -                           | -                         | -                | -          | -            |
| Popcorn calcification                              | -                                                                                      | -                           | -                         | -                | -          | -            |
| Rhizomelic shortening of limbs                     | -                                                                                      | -                           | -                         | -                | -          | -            |
| Bowing of upper extremities                        | -                                                                                      | Yes                         | -                         | -                | -          | -            |
| Bowing and tapering of femur, tibiae and fibulae   | -                                                                                      | Bowing of lower extremities | -                         | -                | -          | -            |
| Exon                                               | 3                                                                                      | 4                           | 4                         | 4                |            | 7            |
| DNA change                                         | c.271_279dup                                                                           | c.440_643del                | c.440_643del              | c.295C>T         |            | c.829_831del |
| Protein                                            | p.Ala91_Ser93dup                                                                       | p.Lys147_Gly215 delinsArg   | p.Lys147_Gly215 delinsArg | p.Arg99*         |            | p.Phe277del  |
| Origin                                             | German/Polish                                                                          | Equadorian                  | Equadorian                | French- Canadian |            | Nepalese     |

|                                                    | Becker et al [2011] |               |                               |                 | Homan et al [2011] |                           |                          |
|----------------------------------------------------|---------------------|---------------|-------------------------------|-----------------|--------------------|---------------------------|--------------------------|
|                                                    | Patient 1           | Patient 2     | Patient 3                     | Patient 4       | Patient V-1        | Patient IV-3              | Patient 3                |
| OI Type                                            | III                 | III           | III                           | III             | VI                 | VI                        | VI                       |
| Birth weight/Birth length                          | Normal/Normal       | Normal/Normal | Normal/Normal                 | Normal/Normal   | Normal/_           | Normal/_                  | Normal/_                 |
| Confirmed prenatal fractures                       | No                  | No            | No                            | No              | No                 | No                        | -                        |
| Age of first fracture (months)                     | 4                   | Unknown       | 6                             | 6               | 9                  | -                         | 10                       |
| Color of sclerae                                   | Grayish             | Grayish       | Grayish                       | Grayish         | -                  | White                     | Slightly blue            |
| Dentinogenesis imperfecta                          | No                  | No            | No                            | No              | No                 | -                         | -                        |
| Retarded gross motor functions                     | Yes                 | Yes           | Yes                           | Yes             | Yes                | Yes                       | -                        |
| Normal intelligence                                | Yes                 | Yes           | Yes                           | Yes             | -                  | -                         | -                        |
| Hearing impairment                                 | No                  | No            | No                            | No              | -                  | -                         | -                        |
| Hipermobility of joints                            | No                  | No            | No                            | No              | No                 | No                        | No                       |
| Age at start of treatment with pamidronate (years) | 1                   | 11            | 7                             | 1               | 0                  | 13                        | 2                        |
| Ability to walk (with crutches)                    | No                  | No            | No                            | No              | No                 | No                        | No                       |
| Weight (kg)/BMI of last visit                      | 9,9/17,1            | 45/44,1       | 17/37,8                       | 14/22,8         | No                 | No                        | No                       |
| Length (cm)/SD of last visit)                      | 76/-5,6             | 101/-10,2     | 67/0,2                        | 78,3/-0,7       | -                  | 110//<-2SD                | -                        |
| Wormian bones                                      | -                   | -             | -                             | -               | -                  | -                         | v                        |
| Vertebral fractures                                | Multiple            | Multiple      | Multiple                      | Multiple        | -                  | -                         | -                        |
| Old fractures of extremities                       | Yes                 | Yes           | Yes                           | Yes             | Yes                | Yes                       | Yes                      |
| Tapering of ribs                                   | -                   | -             | -                             | -               | -                  | -                         | -                        |
| Popcorn calcification                              | -                   | -             | -                             | -               | -                  | Yes                       | -                        |
| Rhizomelic shortening of limbs                     | Moderate            | Severe        | Mild upper and moderate lower | Mild            | -                  | -                         | -                        |
| Bowing of upper extremities                        | Moderate            | Severe        | Mild                          | Moderate        | -                  | Severe                    | -                        |
| Bowing and tapering of femur, tibiae and fibulae   | Severe bowing       | Sebere bowing | Moderate bowing               | Moderate bowing | -                  | Severe bowing of femurs   | -                        |
| Exon                                               | 6                   |               | 4                             | 8               | 4                  | 4                         | 8                        |
| DNA change                                         | c.696C>G            |               | c.324_325dup                  | c.1132C>T       | g.4130C>T          | g.4130C>T                 | g.10440_10443dupA<br>TCA |
| Protein                                            | p.Tyr232*           |               | p.Tyr109Serfs*5               | p.Gln378*       | p.R99X             | p.R99X                    | p.H389fsX392             |
| Origin                                             | Arabian             |               | Turkish                       | Turkish         | -                  | French/<br>Canadian/Irish | Italian                  |
